# Supplementary material for: Expression of the Sweet Potato MYB Transcription Factor IbMYB48 Confers Salt and Drought Tolerance in Arabidopsis
Source: MDPI journal article supplement (doi:10.3390/genes13101883), 2022-10-17
Supplement: s1 [file s1]

**Table S1.** The primers used in this study.

| Primer name    | Primer sequence                        |
|----------------|----------------------------------------|
| IbMYB48 GW-1   | CTATTGCCCCATTTGGAGTGGAGTT              |
| IbMYB48 GW-2   | TTCAACCCTACCAAAAGCATGTGAA              |
| IbMYB48 G-F    | ATGAAGATGATGATGATGAGGAGA               |
| IbMYB48 G-R    | ATTATATTGTGCATAATCTTGTTGT              |
| IbMYB48 ORF-F  | ATGAAGATGATGATGATGAGGAGA               |
| IbMYB48 ORF-R  | ATTATATTGTGCATAATCTTGTTGT              |
| IbMYB48 Pro-F  | TGCCTTAGAGACACCATGGACT                 |
| IbMYB48 Pro-R  | CATCTCTTCCTGTGCCATTTTC                 |
| IbActin-F      | AGCAGCATGAAGATTAAGTTGTAGCAC            |
| IbActin-R      | TGGAAAATTAGAAGCACTTCCTGTGAAC           |
| IbMYB48-qPCR-F | ACCAGGACGAACCGACAAC                    |
| IbMYB48-qPCR-R | AGGAAGAGGAATTATTGGAGAGTG               |
| 83-IbMYB48-F   | CCTTAATTAAATGAAGATGATGATGATGAGGAGA     |
| 83-IbMYB48-R   | AGGCGCGCCAATTATATTGTGCATAATCTTGTTG     |
| 162-IbMYB48-F  | CCTTAATTAATGCCTTAGAGACACCATGGACT       |
| 162-IbMYB48-R  | AGGCGCGCCCATCTCTTCCTGTGCCATTTTC        |
| BD1-109-F      | GGAATTCCATATGATGAAGATGATGATGATGAGGAGAG |
| BD1-109-R      | ACGCGTCGACTCACTTTTTCTCATGTGGGT         |
| BD110-266-F    | GGAATTCCATATG GCTAACGAAGACAGAGCCAAC    |
| BD110-266-R    | ACGCGTCGACTCAATTATATTGTGCATAATCTTGG    |
| BD1-266-F      | GGAATTCCATATGATGAAGATGATGATGATGAGGAGA  |
| BD1-266-R      | ACGCGTCGACTCAATTATATTGTGCATAATCTTGG    |
| IbMYB48-OE-F   | GGGGTACCATGAAGATGATGATGATGAGGAGA       |
| IbMYB48-OE-R   | ACGCGTCGACATTATATTGTGCATAATCTTGTTGT    |
| Actin-F        | GCACCCTGTTCTTCTTACCGA                  |
| Actin-R        | AGTAAGGTCACGTCCAGCAAGG                 |
| ZEP-F          | CGGAGCTTTCTTCTTGATGG                   |
| ZEP-R          | TCGATTTCCGAGTTTTCTG                    |
| ABA-F          | TACTTGGGGTAAAGGGCGTG                   |
| ABA-R          | CCAAGGACCCAGTCAAGCAT                   |
| AAO-F          | CAACAGCCATGTTGATACCG                   |
| AAO-R          | TCTTTGACCTGCACATCGAG                   |
| LOX2-F         | CAAACCTCAGAAGACGATGTAAGG               |
| LOX2-R         | GACCTCTCGACCAAGTTATGCC                 |
| MYC2-F         | CGGGTCTTAATTGGAATCTTGAC                |
| MYC2-R         | TTCGTTATTGTGCTTGAGCTAC                 |
| AOC1-F         | ATCTATCTCCATGACAACCTCTCAACAA           |
| AOC1-R         | AGGAACCTGGACCGTTAGATGA                 |
| OPR3-F         | GGCACAAGGGAACTCTAACGAG                 |
| OPR3-R         | CTTGTTTCATCTGAATAGATTCCAGG             |
| P5CS-F         | ATGATCTTATTTATGTTCTGC                  |
| P5CS-R         | CACTATCTTCGTCACTAT                     |

|        |                         |
|--------|-------------------------|
| P5CR-F | AGTTTAGCTTCACAGACCGTTC  |
| P5CR-R | GCTCTGTGAGAGCTCGCGGCTTC |
| SOD-F  | ATGAGAAGTTCTATGAAGAG    |
| SOD-R  | GTCTTTATGTAATCTGGT      |
| CAT-F  | GCAACTACCCCGAGTGGAAA    |
| CAT-R  | TGTTTCAGAACCAAGCGACCA   |
| DHAR-F | ATGGTCCTTTTATCGCCGGG    |
| DHAR-R | GCCCATCCAGAGATCACACA    |

---

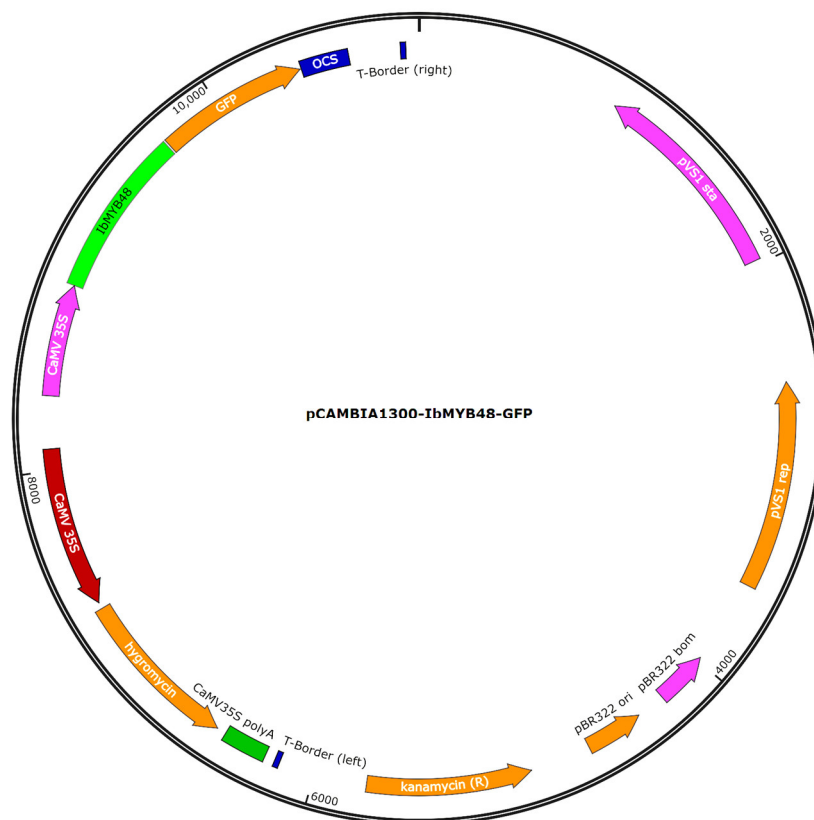

**Figure S1.** The pCambia1300-IbMYB48-GFP vector used in this study.
